# Supplementary material
Source: PubMed Central journal article supplement (PMC2748384)
Supplement: NIHMS126005-supplement-1.pdf [file NIHMS126005-supplement-1.pdf]

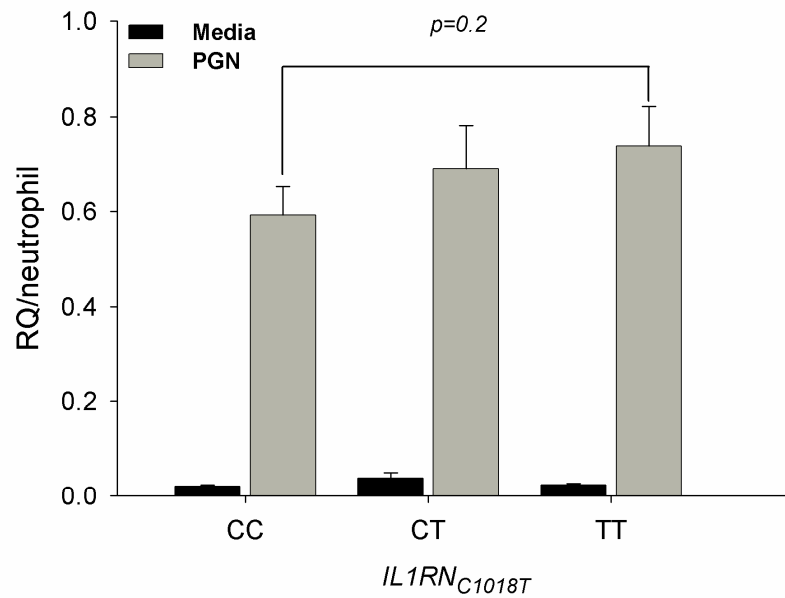

**Supplemental Figure 3.** *IL1RN* gene expression by *IL1RN*<sub>C1018T</sub>. Total RNA was isolated from whole blood obtained from subjects with different *IL1RN*<sub>C1018T</sub> genotypes (CC, n = 19; CT, n = 19; TT, n = 19) that was incubated with media alone or PGN. *IL1RN* transcript levels were determined using quantitative real-time PCR. *GAPDH* transcript levels were determined in each sample and used to normalize *IL1RN* transcript measures. The relative quantity (RQ) was determined by dividing the *GAPDH*-normalized value for each sample by the value from a reference sample and this value was normalized to the neutrophil concentration from each subject. The bars represent mean and standard error of the mean.
