# Supplementary material
Source: PubMed Central journal article supplement (PMC2748384)
Supplement: NIHMS126005-supplement-3.pdf [file NIHMS126005-supplement-3.pdf]

| CHR | SNP             | Non-Missing data | BETA      | L95      | U95     | STAT     | empiric P | multiple test corrected P |
|-----|-----------------|------------------|-----------|----------|---------|----------|-----------|---------------------------|
| 1   | IL10_000472     | 1616             | 0.05271   | -0.03187 | 0.1373  | 1.221    | 0.2458    | 1                         |
| 1   | IL10_001927     | 1616             | -0.008525 | -0.1345  | 0.1174  | -0.1326  | 0.8861    | 1                         |
| 1   | IL10_002911     | 1613             | 0.02726   | -0.0735  | 0.128   | 0.5303   | 0.6004    | 1                         |
| 1   | IL10_005016     | 1611             | -0.03316  | -0.1076  | 0.04128 | -0.873   | 0.3956    | 1                         |
| 1   | IL10_005351     | 1615             | -0.06626  | -0.1499  | 0.01733 | -1.554   | 0.1399    | 1                         |
| 1   | TNFRSF1B_007601 | 1613             | -0.02431  | -0.1046  | 0.05593 | -0.5938  | 0.5295    | 1                         |
| 1   | TNFRSF1B_007856 | 1616             | 0.09134   | -0.05815 | 0.2408  | 1.198    | 0.2288    | 1                         |
| 1   | TNFRSF1B_008549 | 1616             | 0.05471   | -0.0224  | 0.1318  | 1.391    | 0.1419    | 1                         |
| 1   | TNFRSF1B_013884 | 1604             | 0.08961   | -0.08187 | 0.2611  | 1.024    | 0.2877    | 1                         |
| 1   | TNFRSF1B_016650 | 1569             | 0.08691   | -0.02359 | 0.1974  | 1.542    | 0.1299    | 1                         |
| 1   | TNFRSF1B_016786 | 1615             | 0.006959  | -0.08377 | 0.09769 | 0.1503   | 0.8811    | 1                         |
| 1   | TNFRSF1B_018176 | 1523             | -0.0538   | -0.1399  | 0.0323  | -1.225   | 0.2198    | 1                         |
| 1   | TNFRSF1B_019828 | 1614             | -0.04433  | -0.1276  | 0.03898 | -1.043   | 0.2797    | 1                         |
| 1   | TNFRSF1B_023302 | 1616             | -0.07051  | -0.1686  | 0.02754 | -1.409   | 0.1588    | 1                         |
| 1   | TNFRSF1B_023830 | 1392             | -0.004048 | -0.08277 | 0.07467 | -0.1008  | 0.9191    | 1                         |
| 1   | TNFRSF1B_025687 | 1608             | 0.1233    | 0.000333 | 0.2464  | 1.965    | 0.04196   | 0.988                     |
| 1   | TNFRSF1B_026607 | 1547             | -0.02547  | -0.1008  | 0.04989 | -0.6625  | 0.5075    | 1                         |
| 1   | TNFRSF1B_027691 | 1612             | -0.05548  | -0.1397  | 0.02869 | -1.292   | 0.1878    | 1                         |
| 1   | TNFRSF1B_030160 | 1616             | -0.07439  | -0.1669  | 0.01812 | -1.576   | 0.1239    | 1                         |
| 1   | TNFRSF1B_033031 | 1565             | -0.0723   | -0.1584  | 0.01377 | -1.646   | 0.1059    | 1                         |
| 1   | TNFRSF1B_037098 | 1615             | -0.03977  | -0.1307  | 0.05113 | -0.8575  | 0.3876    | 1                         |
| 1   | TNFRSF1B_038345 | 1609             | -0.04778  | -0.1302  | 0.03467 | -1.136   | 0.2527    | 1                         |
| 1   | TNFRSF1B_042065 | 1607             | 0.008373  | -0.06093 | 0.07768 | 0.2368   | 0.8412    | 1                         |
| 1   | TNFRSF1B_042799 | 1614             | 0.0218    | -0.05194 | 0.09554 | 0.5794   | 0.5584    | 1                         |
| 1   | TNFRSF1B_043299 | 1610             | 0.001101  | -0.0876  | 0.08981 | 0.02433  | 0.981     | 1                         |
| 1   | TNFRSF1B_045022 | 1610             | 0.04504   | -0.09075 | 0.1808  | 0.6501   | 0.5205    | 1                         |
| 2   | IL1B_000302     | 1542             | 0.00202   | -0.07959 | 0.08363 | 0.04852  | 0.962     | 1                         |
| 2   | IL1B_002143     | 1572             | 0.01115   | -0.0654  | 0.0877  | 0.2855   | 0.7912    | 1                         |
| 2   | IL1B_003298     | 1516             | -0.04785  | -0.1222  | 0.02648 | -1.262   | 0.2138    | 1                         |
| 2   | IL1B_004006     | 1588             | 0.02005   | -0.1226  | 0.1627  | 0.2756   | 0.7822    | 1                         |
| 2   | IL1B_005277     | 1575             | 0.02675   | -0.06136 | 0.1149  | 0.5951   | 0.5445    | 1                         |
| 2   | IL1B_007114     | 1583             | 0.05312   | -0.08283 | 0.1891  | 0.7658   | 0.4386    | 1                         |
| 2   | IL1B_008234     | 1533             | 0.02131   | -0.06864 | 0.1113  | 0.4643   | 0.6214    | 1                         |
| 2   | IL1B_008546     | 1594             | 0.02634   | -0.1063  | 0.159   | 0.389    | 0.7023    | 1                         |
| 2   | IL1B_012885     | 1592             | -0.001206 | -0.077   | 0.07459 | -0.03119 | 0.979     | 1                         |
| 2   | IL1B_015235     | 1585             | 0.02318   | -0.1076  | 0.154   | 0.3474   | 0.7353    | 1                         |

|   |              |      |           |          |          |           |          |         |
|---|--------------|------|-----------|----------|----------|-----------|----------|---------|
| 2 | IL1RN_001018 | 1614 | 0.05518   | -0.021   | 0.1314   | 1.42      | 0.1538   | 1       |
| 2 | IL1RN_002765 | 1614 | 0.01254   | -0.0601  | 0.08517  | 0.3383    | 0.7303   | 1       |
| 2 | IL1RN_005848 | 1614 | 0.008177  | -0.1008  | 0.1171   | 0.1471    | 0.8851   | 1       |
| 2 | IL1RN_007498 | 1615 | 0.01768   | -0.06235 | 0.09772  | 0.4331    | 0.6434   | 1       |
| 2 | IL1RN_010257 | 1612 | -0.06033  | -0.1551  | 0.03448  | -1.247    | 0.2358   | 1       |
| 2 | IL1RN_012602 | 1597 | 0.01903   | -0.09109 | 0.1292   | 0.3387    | 0.7393   | 1       |
| 2 | IL1RN_012903 | 1609 | 0.01045   | -0.06207 | 0.08298  | 0.2825    | 0.7842   | 1       |
| 2 | IL1RN_013888 | 1610 | 0.1675    | 0.07626  | 0.2588   | 3.597     | 0.001998 | 0.04496 |
| 2 | IL1RN_015132 | 1612 | 0.000213  | -0.07845 | 0.07888  | 0.005313  | 0.994    | 1       |
| 2 | IL1RN_015453 | 1611 | -0.04234  | -0.1216  | 0.03693  | -1.047    | 0.2987   | 1       |
| 2 | IL1RN_015653 | 1614 | -0.009498 | -0.1127  | 0.09368  | -0.1804   | 0.8581   | 1       |
| 2 | IL1RN_016184 | 1614 | 0.008439  | -0.06956 | 0.08644  | 0.2121    | 0.8042   | 1       |
| 2 | IL1RN_016857 | 1608 | -0.03762  | -0.1187  | 0.04351  | -0.9088   | 0.3776   | 1       |
| 2 | IL1RN_018694 | 1615 | -0.0178   | -0.09387 | 0.05828  | -0.4586   | 0.6394   | 1       |
| 2 | IL1RN_019327 | 1605 | 0.04169   | -0.03288 | 0.1163   | 1.096     | 0.2897   | 1       |
| 4 | IL8_003470   | 1613 | -0.005812 | -0.07875 | 0.06713  | -0.1562   | 0.8841   | 1       |
| 4 | IL8_004501   | 1607 | -0.01579  | -0.08897 | 0.05739  | -0.4228   | 0.6853   | 1       |
| 5 | IL4_003900   | 1615 | -0.03591  | -0.1661  | 0.09429  | -0.5406   | 0.6034   | 1       |
| 5 | IL4_004773   | 1616 | -0.01406  | -0.1486  | 0.1204   | -0.2049   | 0.8621   | 1       |
| 5 | IL4_004874   | 1391 | -0.00016  | -0.1423  | 0.142    | -0.002207 | 0.998    | 1       |
| 5 | IL4_005593   | 1616 | 0.000592  | -0.1361  | 0.1372   | 0.008488  | 0.991    | 1       |
| 5 | IL4_007280   | 1614 | 0.04069   | -0.07856 | 0.1599   | 0.6687    | 0.5195   | 1       |
| 5 | IL4_012459   | 1616 | 0.04698   | -0.05147 | 0.1454   | 0.9353    | 0.3367   | 1       |
| 5 | IL4_015508   | 1610 | 0.03609   | -0.04478 | 0.117    | 0.8746    | 0.3956   | 1       |
| 5 | IL4_016082   | 1615 | -0.01223  | -0.1283  | 0.1039   | -0.2064   | 0.8432   | 1       |
| 5 | IL4_017615   | 1616 | 0.06074   | -0.03522 | 0.1567   | 1.241     | 0.2228   | 1       |
| 6 | LTA_000306   | 1542 | -0.05419  | -0.1519  | 0.0435   | -1.087    | 0.2627   | 1       |
| 6 | LTA_002490   | 1587 | 0.01371   | -0.06015 | 0.08756  | 0.3637    | 0.7013   | 1       |
| 6 | LTA_002619   | 1595 | -0.05379  | -0.1355  | 0.02795  | -1.29     | 0.1828   | 1       |
| 6 | LTA_002820   | 1606 | -0.1086   | -0.2649  | 0.04775  | -1.361    | 0.1858   | 1       |
| 6 | LTA_002847   | 1542 | 0.04183   | -0.03621 | 0.1199   | 1.05      | 0.2847   | 1       |
| 6 | LTB_000712   | 1593 | 0.09886   | -0.01324 | 0.211    | 1.729     | 0.08092  | 1       |
| 6 | TNF_000282   | 1604 | -0.008466 | -0.1068  | 0.0899   | -0.1687   | 0.8721   | 1       |
| 6 | TNF_001440   | 1560 | -0.03113  | -0.1793  | 0.117    | -0.4119   | 0.6703   | 1       |
| 6 | TNF_004101   | 1422 | -0.1659   | -0.303   | -0.02872 | -2.37     | 0.01998  | 0.7762  |
| 7 | IL6_001510   | 1590 | -0.05553  | -0.1293  | 0.01823  | -1.476    | 0.1329   | 1       |
| 7 | IL6_002892   | 1555 | -0.02024  | -0.1509  | 0.1104   | -0.3036   | 0.7493   | 1       |

|    |                 |      |           |          |         |          |         |   |
|----|-----------------|------|-----------|----------|---------|----------|---------|---|
| 7  | IL6_002989      | 1575 | -0.05313  | -0.1274  | 0.02117 | -1.401   | 0.1638  | 1 |
| 7  | IL6_003084      | 1583 | -0.07082  | -0.2195  | 0.07786 | -0.9335  | 0.3616  | 1 |
| 7  | IL6_003437      | 1585 | 0.04524   | -0.03278 | 0.1233  | 1.136    | 0.2617  | 1 |
| 7  | IL6_003572      | 1586 | -0.03348  | -0.1068  | 0.03985 | -0.8948  | 0.3726  | 1 |
| 7  | IL6_005014      | 1574 | -0.03863  | -0.1124  | 0.03509 | -1.027   | 0.3107  | 1 |
| 7  | IL6_007592      | 1574 | 0.01893   | -0.05914 | 0.09699 | 0.4751   | 0.6254  | 1 |
| 11 | RELA_004098     | 1598 | -0.07491  | -0.1759  | 0.02607 | -1.454   | 0.1548  | 1 |
| 11 | RELA_006499     | 1610 | 0.009968  | -0.06495 | 0.08489 | 0.2608   | 0.8012  | 1 |
| 11 | RELA_008813     | 1616 | -0.05302  | -0.1642  | 0.05819 | -0.9344  | 0.3327  | 1 |
| 11 | RELA_010549     | 1616 | 0.007636  | -0.1404  | 0.1557  | 0.1011   | 0.9211  | 1 |
| 11 | RELA_010906     | 1612 | 0.06571   | -0.0103  | 0.1417  | 1.694    | 0.08591 | 1 |
| 12 | IFNG_000801     | 1616 | -0.02069  | -0.1658  | 0.1244  | -0.2794  | 0.7692  | 1 |
| 12 | IFNG_003677     | 1610 | -0.007953 | -0.08717 | 0.07126 | -0.1968  | 0.8501  | 1 |
| 12 | IFNG_006864     | 1616 | 0.01041   | -0.06184 | 0.08266 | 0.2825   | 0.7752  | 1 |
| 12 | IFNG_007303     | 1613 | -0.03126  | -0.1672  | 0.1046  | -0.4509  | 0.6434  | 1 |
| 12 | TNFRSF1A_002241 | 1606 | -0.02399  | -0.09664 | 0.04866 | -0.6473  | 0.5445  | 1 |
| 12 | TNFRSF1A_004071 | 1613 | -0.02289  | -0.09561 | 0.04983 | -0.617   | 0.5594  | 1 |
| 12 | TNFRSF1A_005664 | 1613 | 0.0473    | -0.0245  | 0.1191  | 1.291    | 0.1968  | 1 |
| 12 | TNFRSF1A_005749 | 1602 | -0.03613  | -0.1618  | 0.08953 | -0.5635  | 0.5864  | 1 |
| 12 | TNFRSF1A_007205 | 1596 | 0.04774   | -0.02408 | 0.1195  | 1.303    | 0.1898  | 1 |
| 12 | TNFRSF1A_010841 | 1430 | 0.03875   | -0.03694 | 0.1144  | 1.003    | 0.3277  | 1 |
| 14 | NFKBIA_000156   | 1616 | 0.007114  | -0.08056 | 0.09479 | 0.159    | 0.8821  | 1 |
| 14 | NFKBIA_003026   | 1616 | 0.02595   | -0.06488 | 0.1168  | 0.56     | 0.6004  | 1 |
| 14 | NFKBIA_004754   | 1616 | 0.01838   | -0.05736 | 0.09412 | 0.4757   | 0.6573  | 1 |
| 14 | NFKBIA_005519   | 1616 | -0.002238 | -0.08342 | 0.07895 | -0.05402 | 0.9411  | 1 |
| 17 | STAT3_000301    | 1615 | -0.04482  | -0.1267  | 0.03703 | -1.073   | 0.2807  | 1 |
| 17 | STAT3_040938    | 1607 | -0.06647  | -0.1467  | 0.01373 | -1.624   | 0.0969  | 1 |
| 17 | STAT3_042252    | 1615 | -0.03718  | -0.1119  | 0.0375  | -0.9758  | 0.3377  | 1 |
| 17 | STAT3_044677    | 1612 | 0.04756   | -0.09481 | 0.1899  | 0.6547   | 0.4805  | 1 |
| 17 | STAT3_049631    | 1609 | -0.03481  | -0.1095  | 0.03989 | -0.9134  | 0.3766  | 1 |
| 17 | STAT3_050838    | 1563 | 0.01089   | -0.1368  | 0.1586  | 0.1446   | 0.8591  | 1 |
| 17 | STAT3_060990    | 1612 | -0.01537  | -0.088   | 0.05725 | -0.4149  | 0.6703  | 1 |
| 17 | STAT3_065854    | 1612 | -0.08895  | -0.2244  | 0.04654 | -1.287   | 0.2038  | 1 |
| 17 | STAT3_067661    | 1614 | -0.00264  | -0.09559 | 0.09031 | -0.05567 | 0.962   | 1 |
| 17 | STAT3_072927    | 1614 | -0.01592  | -0.1053  | 0.07343 | -0.3492  | 0.7043  | 1 |
| 22 | PPARA_003343    | 1615 | -0.08145  | -0.1893  | 0.02645 | -1.48    | 0.1129  | 1 |
| 22 | PPARA_008557    | 1611 | -0.04641  | -0.1243  | 0.03152 | -1.167   | 0.2557  | 1 |

|    |              |      |          |          |         |         |        |   |
|----|--------------|------|----------|----------|---------|---------|--------|---|
| 22 | PPARA_009273 | 1584 | -0.05108 | -0.1316  | 0.02943 | -1.243  | 0.2258 | 1 |
| 22 | PPARA_022409 | 1616 | -0.00812 | -0.1027  | 0.08647 | -0.1683 | 0.8791 | 1 |
| 22 | PPARA_039413 | 1615 | 0.002932 | -0.112   | 0.1178  | 0.05002 | 0.963  | 1 |
| 22 | PPARA_048348 | 1612 | 0.06167  | -0.02675 | 0.1501  | 1.367   | 0.1748 | 1 |
| 22 | PPARA_063382 | 1616 | 0.02184  | -0.05955 | 0.1032  | 0.5258  | 0.6004 | 1 |
| 22 | PPARA_063724 | 1590 | 0.0465   | -0.03441 | 0.1274  | 1.126   | 0.2577 | 1 |
| 22 | PPARA_068451 | 1615 | 0.05788  | -0.03218 | 0.1479  | 1.26    | 0.2028 | 1 |
| 22 | PPARA_075694 | 1604 | 0.07525  | -0.01863 | 0.1691  | 1.571   | 0.1149 | 1 |
| 22 | PPARA_075876 | 1614 | 0.08152  | -0.03422 | 0.1973  | 1.38    | 0.1528 | 1 |
| 22 | PPARA_076198 | 1616 | 0.07761  | -0.01637 | 0.1716  | 1.619   | 0.1069 | 1 |
| 22 | PPARA_077215 | 1616 | 0.0902   | -0.02526 | 0.2057  | 1.531   | 0.1169 | 1 |
| 22 | PPARA_082789 | 1616 | 0.0878   | -0.02422 | 0.1998  | 1.536   | 0.1169 | 1 |
