# Supplementary material
Source: PubMed Central journal article supplement (PMC2748384)
Supplement: NIHMS126005-supplement-4.pdf [file NIHMS126005-supplement-4.pdf]

| SeattleSNP ID  | rsID       | CHR | POSITION  | Frequency Missing | Minor allele freq | Genotype freq | HWE p-value |
|----------------|------------|-----|-----------|-------------------|-------------------|---------------|-------------|
| TNRSF1B_007601 | rs496888   | 1   | 12155393  | 0.00293427        | 0.298753          | 143/768/853   | 0.1115      |
| TNRSF1B_007856 | rs1148458  | 1   | 12155648  | 0.00117371        | 0.0628183         | 8/206/1553    | 0.6836      |
| TNRSF1B_008549 | rs976881   | 1   | 12156341  | 0.000586854       | 0.315507          | 178/759/830   | 0.8257      |
| TNRSF1B_013884 | rs499646   | 1   | 12161676  | 0.0114437         | 0.0502283         | 1/174/1577    | 0.1254      |
| TNRSF1B_016650 | rs5745991  | 1   | 12164442  | 0.0308099         | 0.132439          | 22/410/1282   | 0.1137      |
| TNRSF1B_016786 | rs816050   | 1   | 12164578  | 0.00146714        | 0.199604          | 69/567/1130   | 0.8818      |
| TNRSF1B_018176 | rs542282   | 1   | 12165964  | 0.0536972         | 0.250299          | 100/636/934   | 0.6018      |
| TNRSF1B_019828 | rs505844   | 1   | 12167616  | 0.00234742        | 0.262323          | 110/706/949   | 0.1759      |
| TNRSF1B_023302 | rs5746001  | 1   | 12171090  | 0                 | 0.169496          | 40/519/1208   | 0.07576     |
| TNRSF1B_023830 | rs1201157  | 1   | 12171618  | 0.119718          | 0.40748           | 254/734/536   | 0.9156      |
| TNRSF1B_025687 | rs5746014  | 1   | 12173475  | 0.00557512        | 0.0960773         | 19/300/1440   | 0.4117      |
| TNRSF1B_026607 | rs653667   | 1   | 12174395  | 0.0284624         | 0.37212           | 242/776/675   | 0.4354      |
| TNRSF1B_027691 | rs1768642  | 1   | 12175479  | 0.00234742        | 0.247446          | 103/666/993   | 0.565       |
| TNRSF1B_030160 | rs590977   | 1   | 12177947  | 0.000293427       | 0.186474          | 62/535/1170   | 0.9375      |
| TNRSF1B_033031 | rs235249   | 1   | 12180818  | 0.0393192         | 0.242265          | 93/644/976    | 0.3568      |
| TNRSF1B_037098 | rs5746053  | 1   | 12184885  | 0.000586854       | 0.20017           | 64/579/1123   | 0.3347      |
| TNRSF1B_038345 | rs17884213 | 1   | 12186132  | 0.00821596        | 0.276578          | 123/727/909   | 0.1897      |
| TNRSF1B_042799 | rs1061628  | 1   | 12190586  | 0.00176056        | 0.395184          | 274/847/644   | 0.9207      |
| TNRSF1B_043299 | rs1061631  | 1   | 12191086  | 0.00440141        | 0.210511          | 76/589/1095   | 0.8297      |
| TNRSF1B_045022 | rs5746078  | 1   | 12192809  | 0.00410798        | 0.0763771         | 11/247/1503   | 0.7363      |
| IL10_005351    | rs3024498  | 1   | 205008152 | 0.000586854       | 0.253681          | 108/680/978   | 0.5296      |
| IL10_005016    | rs3024496  | 1   | 205008487 | 0.00234742        | 0.474177          | 376/919/467   | 0.05617     |
| IL10_002911    | rs3024493  | 1   | 205010591 | 0.000880282       | 0.157596          | 38/480/1246   | 0.3246      |
| IL10_001927    | rs3021094  | 1   | 205011575 | 0                 | 0.0916808         | 15/294/1458   | 0.8871      |
| IL10_000472    | rs1800872  | 1   | 205013030 | 0.000880282       | 0.241506          | 101/651/1014  | 0.8455      |
| IL1B_015235    | rs3917375  | 2   | 113296903 | 0.0158451         | 0.0868938         | 9/283/1440    | 0.2871      |
| IL1B_012885    | rs3917368  | 2   | 113299253 | 0.0178991         | 0.364002          | 223/820/696   | 0.4685      |
| IL1B_008546    | rs2853550  | 2   | 113303592 | 0.0152582         | 0.0833813         | 8/274/1457    | 0.2696      |
| IL1B_008234    | rs1071676  | 2   | 113303904 | 0.0498826         | 0.226675          | 79/600/993    | 0.3646      |
| IL1B_007114    | rs1143642  | 2   | 113305024 | 0.0193662         | 0.0794798         | 8/259/1463    | 0.4122      |
| IL1B_005277    | rs1143634  | 2   | 113306861 | 0.0217136         | 0.228754          | 86/614/1018   | 0.6324      |
| IL1B_004006    | rs1143630  | 2   | 113308126 | 0.0243545         | 0.0708934         | 7/232/1496    | 0.7142      |
| IL1B_003298    | rs3917356  | 2   | 113308834 | 0.0648474         | 0.446019          | 331/817/510   | 0.9208      |
| IL1B_002143    | rs1143629  | 2   | 113309989 | 0.0237676         | 0.337995          | 204/752/760   | 0.3884      |
| IL1B_000302    | rs1143625  | 2   | 113311830 | 0.0319836         | 0.263658          | 132/624/928   | 0.05999     |
| IL1RN_001018   | rs4251961  | 2   | 113590938 | 0.000880282       | 0.372521          | 232/851/682   | 0.203       |

|              |           |   |           |             |           |             |         |
|--------------|-----------|---|-----------|-------------|-----------|-------------|---------|
| IL1RN_002765 | rs315919  | 2 | 113592684 | 0.00205399  | 0.407932  | 303/834/628 | 0.375   |
| IL1RN_005848 | rs3213448 | 2 | 113595768 | 0.0032277   | 0.126062  | 29/387/1349 | 0.8289  |
| IL1RN_007498 | rs315936  | 2 | 113597418 | 0.00117371  | 0.272084  | 138/685/943 | 0.4002  |
| IL1RN_010257 | rs315934  | 2 | 113600177 | 0.00176056  | 0.187748  | 50/562/1151 | 0.06097 |
| IL1RN_012602 | rs3181052 | 2 | 113602520 | 0.0187793   | 0.121637  | 30/365/1352 | 0.3694  |
| IL1RN_012903 | rs1794066 | 2 | 113602821 | 0.00352113  | 0.414156  | 312/833/614 | 0.3257  |
| IL1RN_013888 | rs2232354 | 2 | 113603806 | 0.00264085  | 0.202841  | 62/590/1108 | 0.1402  |
| IL1RN_015132 | rs432014  | 2 | 113605050 | 0.0032277   | 0.287741  | 155/704/903 | 0.2955  |
| IL1RN_015453 | rs380092  | 2 | 113605371 | 0.00381455  | 0.304484  | 162/749/851 | 0.9105  |
| IL1RN_015653 | rs3087266 | 2 | 113605571 | 0.00234742  | 0.147025  | 34/451/1280 | 0.5061  |
| IL1RN_016184 | rs579543  | 2 | 113606102 | 0.000586854 | 0.283286  | 159/682/924 | 0.04611 |
| IL1RN_016857 | rs315952  | 2 | 113606775 | 0.00410798  | 0.282547  | 137/720/902 | 0.7243  |
| IL1RN_018694 | rs397211  | 2 | 113608612 | 0.000586854 | 0.310589  | 184/729/853 | 0.1335  |
| IL1RN_019327 | rs315949  | 2 | 113609245 | 0.00528169  | 0.404613  | 280/861/615 | 0.488   |
| IL8_003470   | rs4073    | 4 | 74824888  | 0.00410798  | 0.468236  | 388/875/500 | 0.886   |
| IL8_004501   | rs2227306 | 4 | 74825919  | 0.00850939  | 0.426337  | 330/839/589 | 0.3062  |
| IL4_003900   | rs2243208 | 5 | 132029050 | 0.000586854 | 0.083239  | 13/268/1485 | 0.7556  |
| IL4_004773   | rs2243218 | 5 | 132029923 | 0.00205399  | 0.0772496 | 12/249/1506 | 0.6152  |
| IL4_004874   | rs2243219 | 5 | 132030024 | 0.107981    | 0.0817466 | 13/223/1287 | 0.307   |
| IL4_005593   | rs2243221 | 5 | 132030743 | 0.00176056  | 0.0766836 | 10/251/1506 | 1       |
| IL4_007280   | rs2243302 | 5 | 132032430 | 0.00264085  | 0.108905  | 13/358/1392 | 0.06424 |
| IL4_012459   | rs2070874 | 5 | 132037609 | 0.00146714  | 0.166101  | 47/493/1227 | 0.8635  |
| IL4_015508   | rs2227284 | 5 | 132040624 | 0.00264085  | 0.277115  | 136/704/921 | 0.9526  |
| IL4_016082   | rs2243263 | 5 | 132041198 | 0.00293427  | 0.109003  | 17/351/1398 | 0.391   |
| IL4_017615   | rs2243274 | 5 | 132042731 | 0           | 0.17176   | 55/497/1215 | 0.6163  |
| LTA_000306   | rs2009658 | 6 | 31646223  | 0.0393192   | 0.167456  | 51/464/1175 | 0.5411  |
| LTA_000559   | rs915654  | 6 | 31646476  | 0.368251    | 0.35488   | 148/533/487 | 0.8984  |
| LTA_002490   | rs746868  | 6 | 31648408  | 0.0208333   | 0.400346  | 282/826/628 | 0.7264  |
| LTA_002619   | rs2229094 | 6 | 31648535  | 0.0199531   | 0.267622  | 130/674/941 | 0.5415  |
| LTA_002820   | rs2229092 | 6 | 31648736  | 0.0064554   | 0.0554923 | 5/185/1567  | 1       |
| LTA_002847   | rs1041981 | 6 | 31648763  | 0.0871479   | 0.322044  | 175/734/774 | 0.9555  |
| TNF_000282   | rs1800629 | 6 | 31651010  | 0.0108568   | 0.156874  | 48/454/1251 | 0.3672  |
| TNF_001440   | rs3093662 | 6 | 31652168  | 0.032277    | 0.0670767 | 11/207/1489 | 0.1787  |
| LTB_000712   | rs769174  | 6 | 31659045  | 0.0340376   | 0.121343  | 22/379/1342 | 0.4996  |
| IL6_001510   | rs1800795 | 7 | 22733170  | 0.0120305   | 0.393207  | 276/814/647 | 0.4511  |
| IL6_002892   | rs2069837 | 7 | 22734552  | 0.038439    | 0.0820588 | 14/251/1435 | 0.4185  |
| IL6_002989   | rs1474347 | 7 | 22734649  | 0.0214202   | 0.391405  | 274/800/648 | 0.3117  |

|                 |            |    |          |             |           |             |          |
|-----------------|------------|----|----------|-------------|-----------|-------------|----------|
| IL6_003084      | rs1524107  | 7  | 22734744 | 0.0199531   | 0.0612717 | 11/190/1529 | 0.08864  |
| IL6_003437      | rs2069840  | 7  | 22735097 | 0.0833333   | 0.336611  | 194/776/759 | 0.8717   |
| IL6_003572      | rs1554606  | 7  | 22735232 | 0.0701291   | 0.420612  | 310/837/585 | 0.7301   |
| IL6_005014      | rs2069845  | 7  | 22736674 | 0.0278756   | 0.424331  | 313/832/573 | 0.7296   |
| IL6_007592      | rs1818879  | 7  | 22739252 | 0.0223005   | 0.309994  | 177/713/831 | 0.195    |
| RELA_010906     | rs10896027 | 11 | 65177336 | 0.0032277   | 0.353091  | 216/813/734 | 0.7153   |
| RELA_010549     | rs1049728  | 11 | 65177693 | 0.000293427 | 0.0591733 | 11/187/1568 | 0.05062  |
| RELA_008813     | rs11227247 | 11 | 65179429 | 0.00146714  | 0.121392  | 21/387/1359 | 0.3148   |
| RELA_006499     | rs11568300 | 11 | 65181743 | 0.00557512  | 0.35625   | 231/792/737 | 0.4357   |
| RELA_004098     | rs732072   | 11 | 65184144 | 0.0132042   | 0.14024   | 51/388/1308 | 0.001437 |
| TNFRSF1A_007205 | rs887477   | 12 | 6316243  | 0.0117371   | 0.462464  | 383/848/514 | 0.3602   |
| TNFRSF1A_005749 | rs4149578  | 12 | 6317698  | 0.00586854  | 0.0893265 | 14/285/1453 | 1        |
| TNFRSF1A_005664 | rs4149577  | 12 | 6317783  | 0.00234742  | 0.467669  | 391/867/505 | 0.5991   |
| TNFRSF1A_004071 | rs4149576  | 12 | 6319376  | 0.00205399  | 0.437358  | 340/863/561 | 0.8089   |
| TNFRSF1A_002241 | rs767455   | 12 | 6321206  | 0.00557512  | 0.440524  | 346/856/555 | 0.6285   |
| IFNG_007303     | rs2069728  | 12 | 66834051 | 0.00264085  | 0.077381  | 10/253/1501 | 1        |
| IFNG_006864     | rs2069727  | 12 | 66834490 | 0.00117371  | 0.447934  | 358/867/542 | 0.7365   |
| IFNG_003677     | rs1861494  | 12 | 66837676 | 0.00234742  | 0.292164  | 151/727/883 | 0.9541   |
| IFNG_000801     | rs2069707  | 12 | 66840555 | 0.000586854 | 0.065648  | 8/216/1543  | 0.8455   |
| NFKBIA_005519   | rs3138055  | 14 | 34940205 | 0.00117371  | 0.275042  | 130/712/925 | 0.7203   |
| NFKBIA_004754   | rs8904     | 14 | 34940968 | 0.00176056  | 0.370968  | 232/847/688 | 0.2626   |
| NFKBIA_003026   | rs1050851  | 14 | 34942677 | 0           | 0.2176    | 66/637/1064 | 0.01435  |
| NFKBIA_002181   | rs1957106  | 14 | 34943521 | 0.244718    | 0.280903  | 106/497/659 | 0.3656   |
| NFKBIA_000156   | rs7157810  | 14 | 34945522 | 0.000293427 | 0.211941  | 85/579/1103 | 0.4333   |
| STAT3_072927    | rs8074524  | 17 | 37723124 | 0.00146714  | 0.201133  | 77/556/1132 | 0.4151   |
| STAT3_067661    | rs8064496  | 17 | 37728390 | 0.00146714  | 0.182436  | 64/516/1185 | 0.4245   |
| STAT3_065854    | rs17881940 | 17 | 37730193 | 0.00410798  | 0.0782757 | 11/254/1498 | 0.8694   |
| STAT3_060990    | rs2293152  | 17 | 37735055 | 0.0032277   | 0.398185  | 296/812/655 | 0.1012   |
| STAT3_050838    | rs2306580  | 17 | 37745206 | 0.0551643   | 0.0669199 | 7/215/1489  | 1        |
| STAT3_049631    | rs3869550  | 17 | 37746413 | 0.00469484  | 0.353894  | 229/787/743 | 0.3754   |
| STAT3_044677    | rs17884478 | 17 | 37751366 | 0.00264085  | 0.0714691 | 6/240/1517  | 0.3686   |
| STAT3_042252    | rs2306581  | 17 | 37753791 | 0.00146714  | 0.354757  | 229/795/742 | 0.4992   |
| STAT3_040938    | rs6503697  | 17 | 37755105 | 0.00733568  | 0.278315  | 140/698/919 | 0.635    |
| STAT3_000301    | rs4796793  | 17 | 37795736 | 0.0032277   | 0.264156  | 122/689/955 | 0.9027   |
| PPARA_003343    | rs4253623  | 22 | 44928770 | 0.00176056  | 0.127762  | 28/395/1342 | 1        |
| PPARA_008557    | rs135543   | 22 | 44933985 | 0.00704225  | 0.312145  | 179/742/841 | 0.4373   |
| PPARA_009273    | rs135542   | 22 | 44934701 | 0.0152582   | 0.274091  | 142/666/925 | 0.1648   |

|              |           |    |          |             |          |             |         |
|--------------|-----------|----|----------|-------------|----------|-------------|---------|
| PPARA_022409 | rs4253655 | 22 | 44947835 | 0.000880282 | 0.165252 | 59/466/1242 | 0.06974 |
| PPARA_039413 | rs4253701 | 22 | 44964774 | 0.000586854 | 0.111552 | 24/346/1396 | 0.6305  |
| PPARA_048348 | rs4253712 | 22 | 44973699 | 0.00352113  | 0.221214 | 82/616/1065 | 0.5809  |
| PPARA_063382 | rs4253728 | 22 | 44988731 | 0           | 0.265422 | 124/690/953 | 1       |
| PPARA_063724 | rs4253730 | 22 | 44989073 | 0.0366784   | 0.277458 | 133/699/907 | 0.9523  |
| PPARA_068451 | rs4253754 | 22 | 44993808 | 0.000586854 | 0.196206 | 71/551/1144 | 0.6508  |
| PPARA_075694 | rs4253760 | 22 | 45001048 | 0.0117371   | 0.180627 | 58/518/1179 | 0.8722  |
| PPARA_075876 | rs4253762 | 22 | 45001226 | 0.00176056  | 0.107426 | 21/337/1406 | 0.901   |
| PPARA_076198 | rs4253765 | 22 | 45001552 | 0.000586854 | 0.1794   | 56/522/1189 | 0.9357  |
| PPARA_077215 | rs4253766 | 22 | 45002569 | 0.000293427 | 0.108093 | 21/340/1406 | 0.9018  |
| PPARA_082789 | rs4253776 | 22 | 45008143 | 0.000586854 | 0.113186 | 26/348/1393 | 0.4072  |
