# Supplementary material
Source: PubMed Central journal article supplement (PMC2748384)
Supplement: NIHMS126005-supplement-6.pdf [file NIHMS126005-supplement-6.pdf]

| <b>GENE</b> | <b>T statistic</b> | <b>multiple testing corrected P-value</b> |
|-------------|--------------------|-------------------------------------------|
| IL1RN       | 12.94              | 0.01                                      |
| TNF/LTA/LTB | 5.618              | 0.20                                      |
| TNFRSF1B    | 3.862              | 0.59                                      |
| RELA        | 2.871              | 0.74                                      |
| STAT3       | 2.639              | 0.79                                      |
| PPARA       | 2.62               | 0.81                                      |
| IL10        | 2.414              | 0.88                                      |
| IL6         | 2.177              | 0.92                                      |
| IL4         | 1.539              | 0.97                                      |
| IL1B        | 1.592              | 0.98                                      |
| TNFRSF1A    | 1.697              | 0.98                                      |
| IFNG        | 0.2033             | 1.00                                      |
| IL8         | 0.1788             | 1.00                                      |
| NFKBIA      | 0.3136             | 1.00                                      |
